# Supplementary material
Source: MDPI journal article supplement (https://www.mdpi.com/2073-4441/13/3/299)

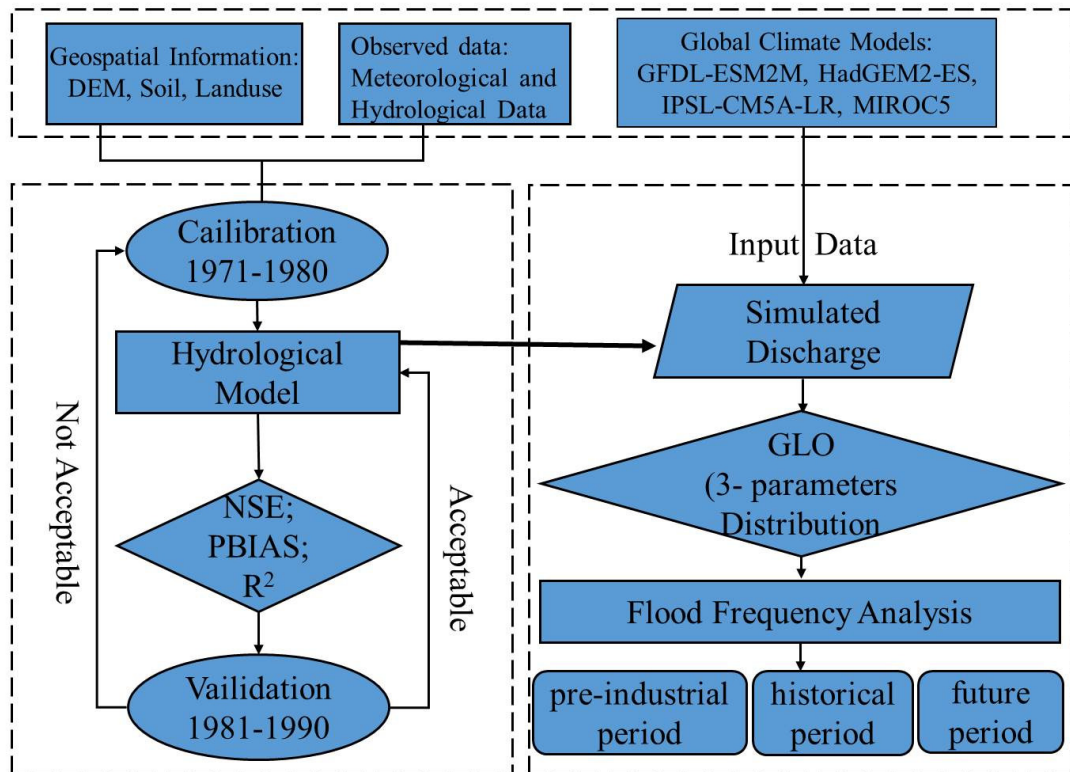

Figure S1: Flow chart for hydrological modelling process.

Supplement: s1 [file s1]
